# Supplementary material
Source: Springer Nature journal article supplement (https://www.springermedizin.de/resource/supplementary/12986_2006_98_MOESM1_ESM.pdf/25655416)

POL diet series

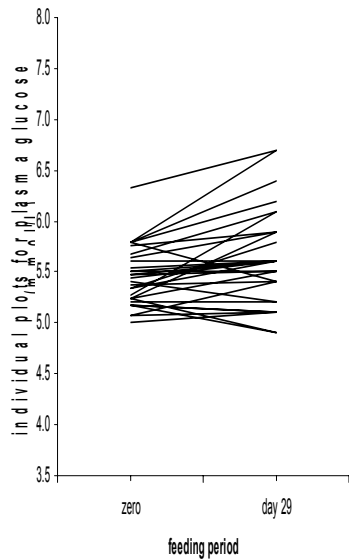

PHSO diet series

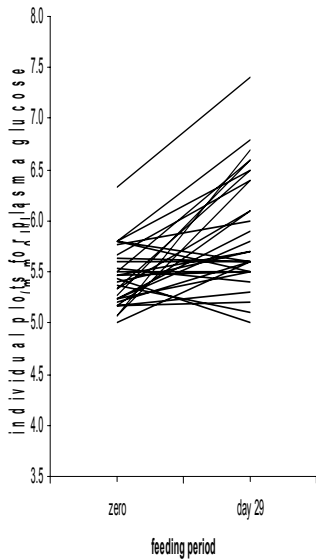

IE diet series

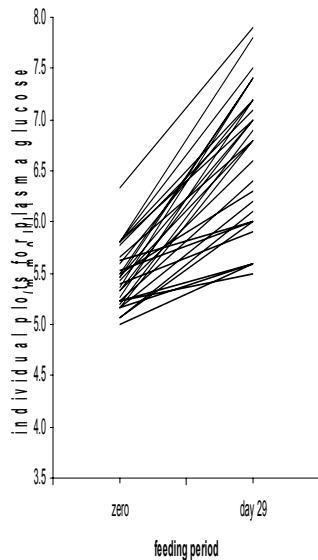

Supplement: MOESM1 [file 25655416]
